# Supplementary material for: ALK Inhibitor Response in Melanomas Expressing EML4-ALK Fusions and Alternate ALK Isoforms
Source: Oxford University Press journal article supplement (doi:10.1158/1535-7163.mct-17-0472), 2017-10-23
Supplement: 15357163mct170472-sup-183698_2_supp_4276963_3whnb8.pdf [file 15357163mct170472-sup-183698_2_supp_4276963_3whnb8.pdf]

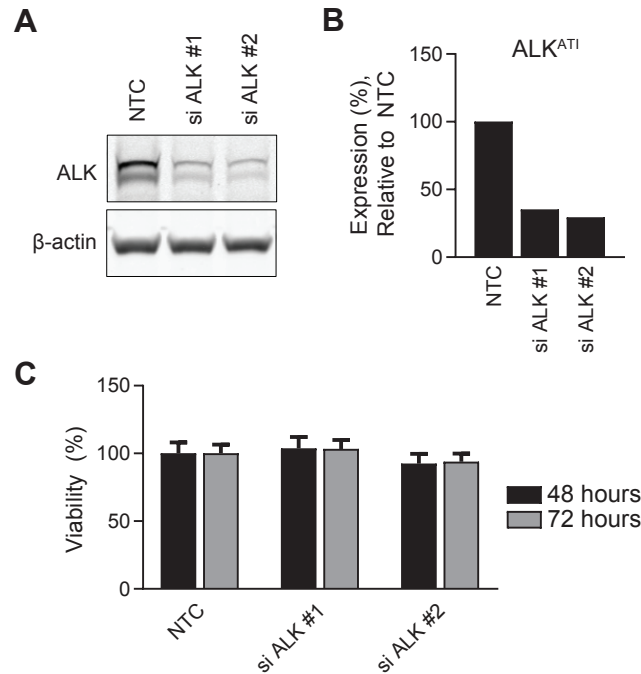

**Supplementary Figure S6.** Knockdown of ALK<sup>ATL</sup> with siRNA does not affect cell viability. **A**, MB 1692 cells were transfected with siRNAs (NTC, non-targeting control). Lysates were collected 72 hours post-transfection and analyzed by immunoblotting. **B**, Immunoblots were quantified to determine ALK<sup>ATL</sup> expression using ImageJ software. ALK<sup>ATL</sup> expression was normalized to  $\beta$ -actin and is shown relative to NTC. **C**, Cells were plated 24 hours post-transfection into duplicate 96-well plates. Viability was analyzed after 48 and 72 hours and normalized to NTC. Error bars represent SEM of three technical triplicates.
